# Supplementary material for: Legume Fingerprinting through Lipid Composition: Utilizing GC/MS with Multivariate Statistics
Source: MDPI journal article supplement (doi:10.3390/foods12244420), 2023-12-09
Supplement: s1 [file s1]

# Legume Fingerprinting through Lipid Composition: Utilizing GC/MS with Multivariate Statistics

Marko Ilić <sup>1,\*</sup>, Kristian Pastor <sup>1</sup>, Aleksandra Ilić <sup>2</sup>, Mirjana Vasić <sup>2</sup>, Nataša Nastić <sup>1</sup>, Đura Vujić <sup>3</sup>  
and Marijana Ačanski <sup>1</sup>

- <sup>1</sup> Faculty of Technology Novi Sad, University of Novi Sad, 21000 Novi Sad, Serbia;  
kristian.pastor@uns.ac.rs (K.P.); natasa.nastic@uns.ac.rs (N.N.); macanski@tf.uns.ac.rs (M.A.)  
<sup>2</sup> Institute of Fields and Vegetable Crops, 21000 Novi Sad, Serbia;  
aleksandra.savic@ifvcns.ns.ac.rs (A.I.)  
<sup>3</sup> Independent Researcher, 21000 Novi Sad, Serbia  
\* Correspondence: marko.ilic@uns.ac.rs; Tel.: +381-21-485-3692

Typical examples of the chromatograms obtained by GC/MS analysis of legume samples, are presented in Figures S1–S5.

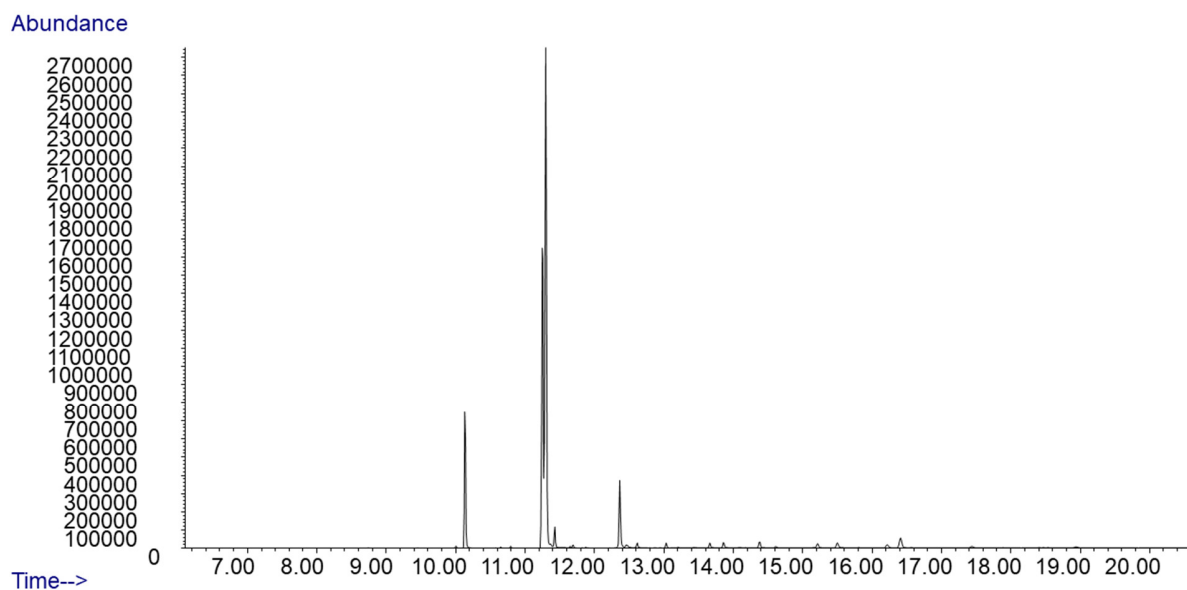

**Figure S1.** An example of the chromatogram obtained by GC/MS analysis of bean samples.

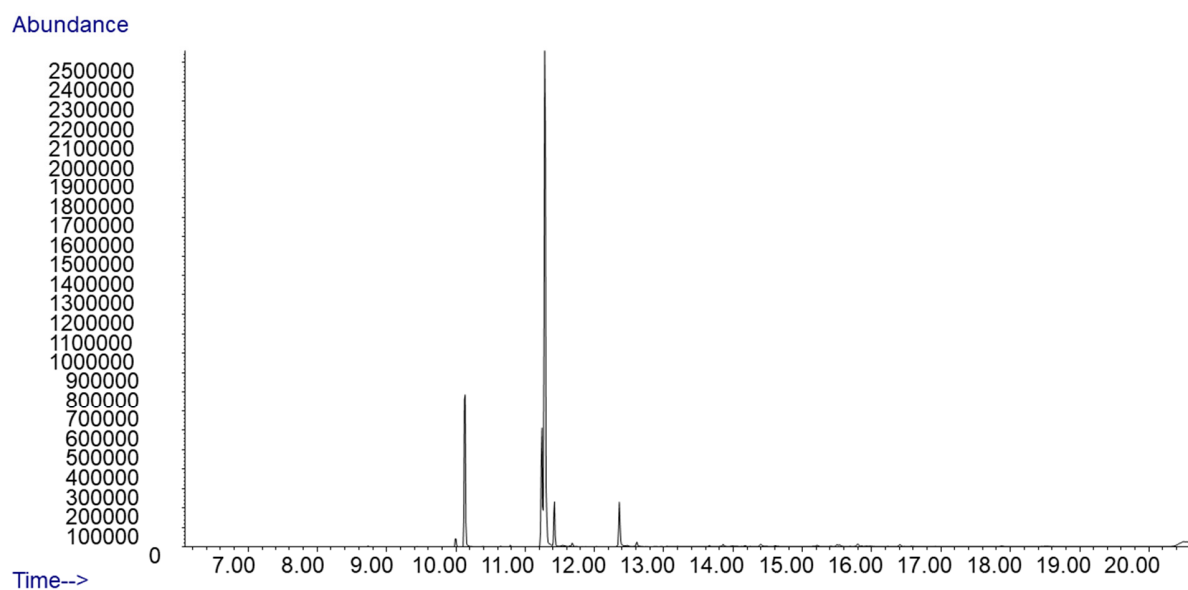

**Figure S2.** An example of the chromatogram obtained by GC/MS analysis of snap bean samples.

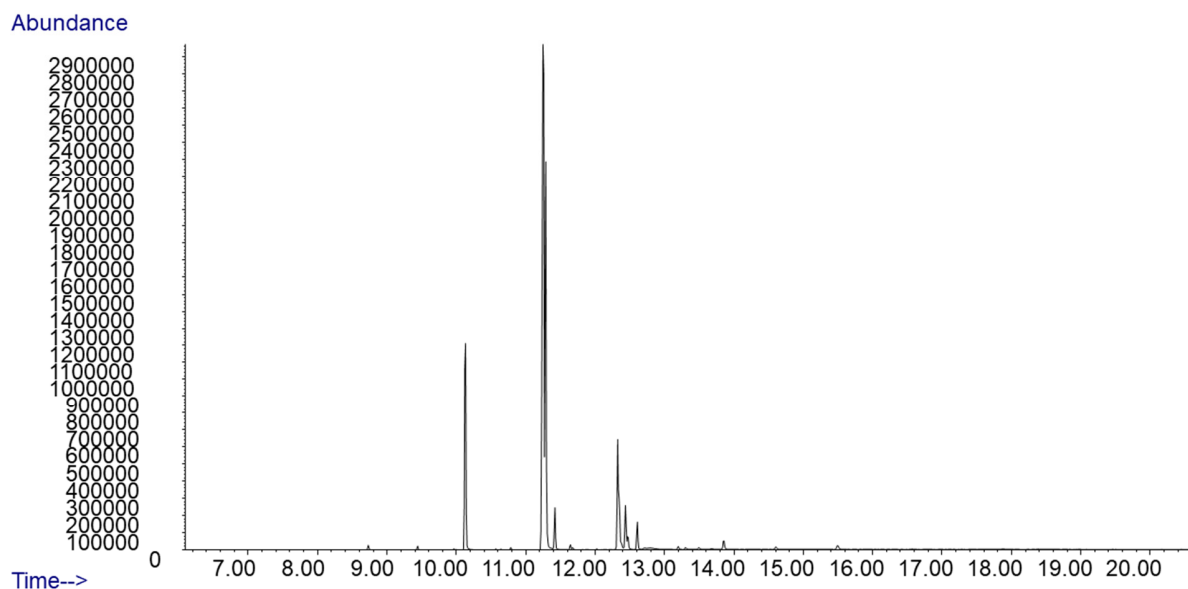

**Figure S3.** An example of the chromatogram obtained by GC/MS analysis of faba bean samples.

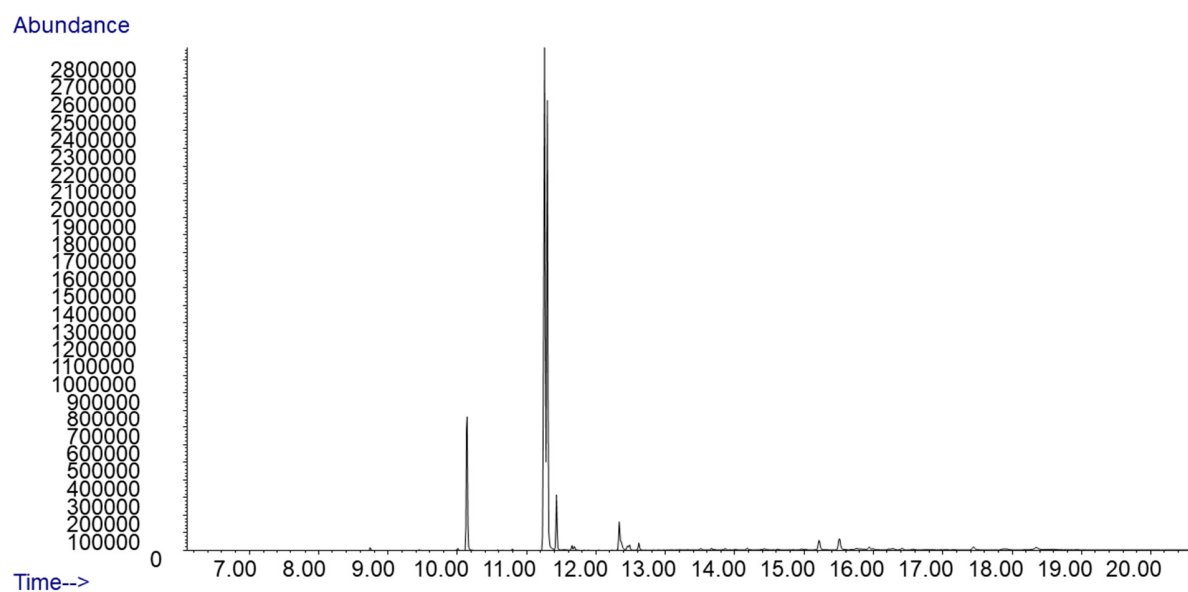

**Figure S4.** An example of the chromatogram obtained by GC/MS analysis of pea samples.

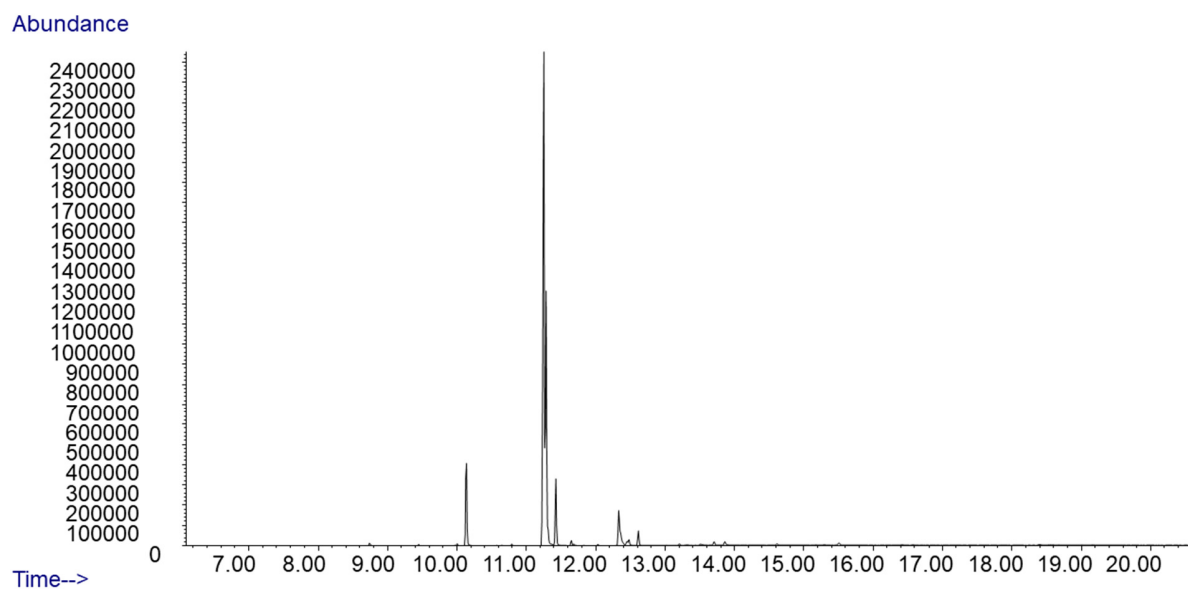

**Figure S5.** An example of the chromatogram obtained by GC/MS analysis of grass pea samples.
